# Supplementary material for: Diffusion in biofilms respiring on electrodes
Source: Royal Society of Chemistry journal article supplement (doi:10.1039/c2ee23394k), 2012-11-15
Supplement: c2ee23394k.pdf [file c2ee23394k.pdf]

1 **ELECTRONIC SUPPLEMENTARY INFORMATION**

2

3 **Supplementary Figures**

4

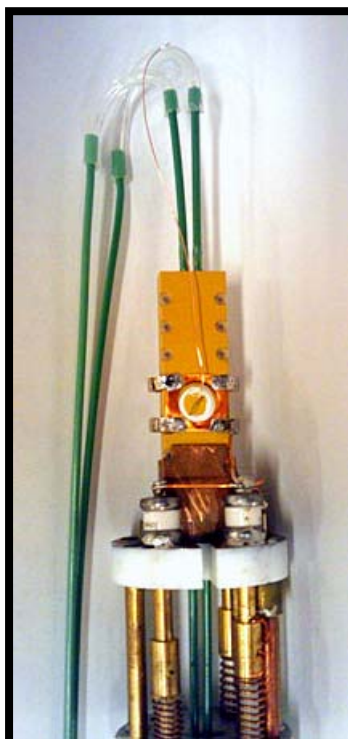

5

6

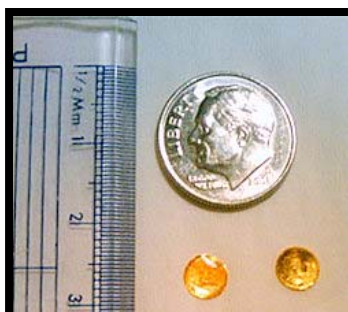

7

8

9

10 **Figure S1. NMR biofilm reactor and electrodes.** Top) The NMR biofilm reactor mounted on the  
11 custom NMR probe. The square copper Alderman-Grant-type resonator is shown surrounding the  
12 reactor door, on which the electrode is mounted. Green PEEK tubing influent lines, coming from  
13 the bottom, and effluent lines, coming from the top, allow for continual perfusion of the biofilm  
14 sample with growth medium. Bottom) Two example gold disc electrodes used to grow biofilms.

14

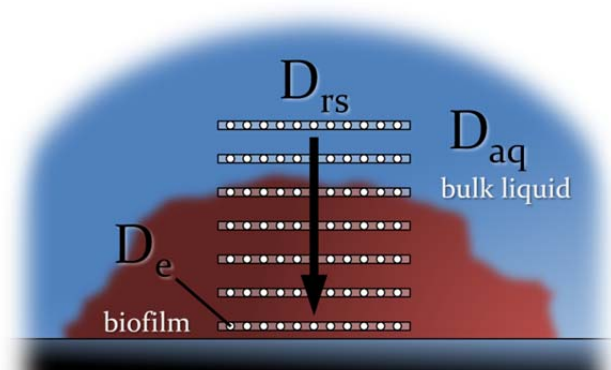

15  
16  
17  
18  
19  
20  
21  
22  
23  
24

**Figure S2. Diffusion coefficients in biofilm systems.** Effective diffusion coefficients ( $D_e$ ) are localized-volume measurements inside biofilms and take into account the hindered molecular diffusion rate caused by biofilm structure and porosity.  $D_e$  are smaller in magnitude than the free bulk liquid diffusion coefficient ( $D_{aq}$ ). Surface-averaged relative effective diffusion coefficients ( $D_{rs}$ ) are a specific type of  $D_e$  generated by averaging  $D_e$  by depth inside the biofilm and normalizing the results against  $D_{aq}$ .  $D_{rs}$  range from a value of 0 to 1, where 1 represents a  $D_{rs}$  that is equal to the  $D_{aq}$ .  $D_{rs}$  are defined mathematically by:

$$D_{rs} = \sum_{n=1}^N \frac{D_e(n)}{N \cdot D_{aq}}$$

25  
26  
27  
28  
29  
30  
31  
32

where  $n$  is the arbitrary index for  $D_e$  values on a single plane parallel to the biofilm substratum and  $N$  is the total number of index values  $n$  on that plane. Figure S3 shows measurement voxels to scale for the  $D_e$  and  $D_{rs}$  measurements in this study.

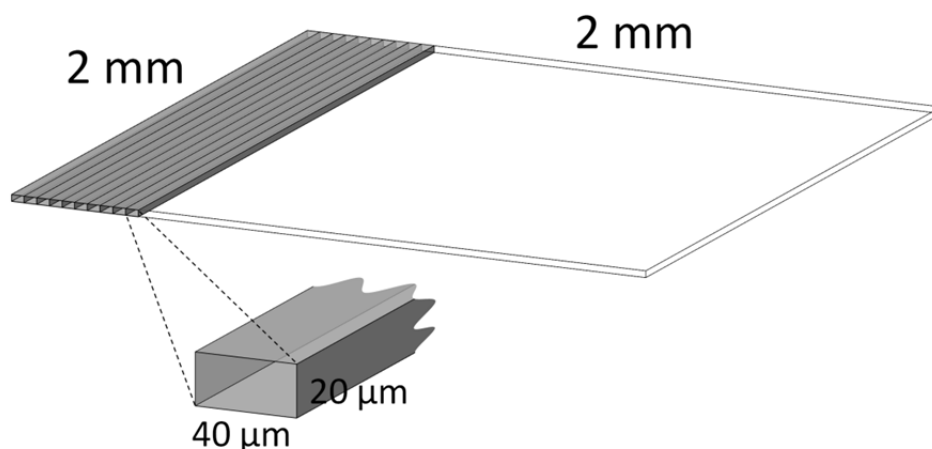

33  
34  
35  
36  
37  
38  
39  
40  
41

**Figure S3. A single plane, parallel to the biofilm substratum, used to generate a  $D_{rs}$  data point in this study.** This figure shows, to scale, 10 example  $D_e$  measurement voxels ( $40 \mu\text{m} \times 20 \mu\text{m} \times 2 \text{mm}$ ) in relationship to the entire apparent  $D_{rs}$  measurement voxel ( $2 \text{mm} \times 20 \mu\text{m} \times 2 \text{mm}$ ). Each  $D_{rs}$  data point is made by averaging 50  $D_e$  values ( $50 \cdot 40 \mu\text{m} = 2 \text{mm}$ ). The depth resolution of  $D_{rs}$  measurements is  $20 \mu\text{m}$ . This voxel is centered on the biofilm (concentric and parallel with the electrode) to avoid the biofilm edges and take measurements where the NMR signal is strong and magnetic field is more homogenous.

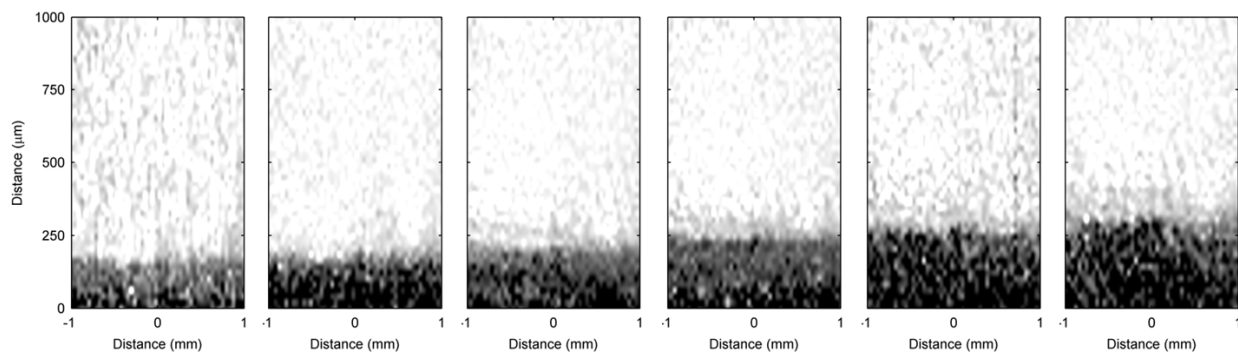

42  
43  
44  
45  
46  
47  
48  
49  
50  
51

**Figure S4. *G. sulfurreducens* biofilm growth.** 2D relative  $D_e$  maps of a *G. sulfurreducens* biofilm and the NMR biofilm reactor obtained by PFG-NMR. The central 2 mm of the biofilm is shown. Each successive panel shows an increasingly older *G. sulfurreducens* biofilm. From left to right, the age is 24 days, 28 days, 33 days, 35 days, 47 days, and 52 days. Growth medium is pumped in the direction from -1 mm to +1 mm, parallel to the electrode.

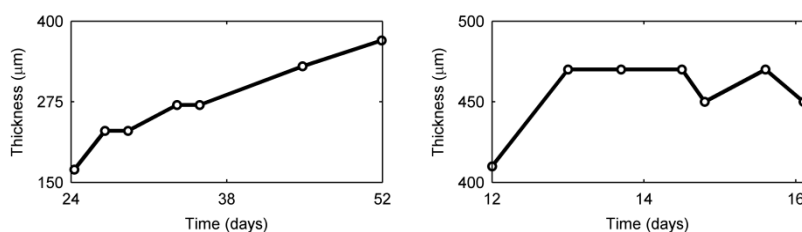

52  
53  
54  
55  
56  
57  
58

**Figure S5. Biofilm thickness over time.** Left) *Geobacter sulfurreducens*; Right) *Shewanella oneidensis*.

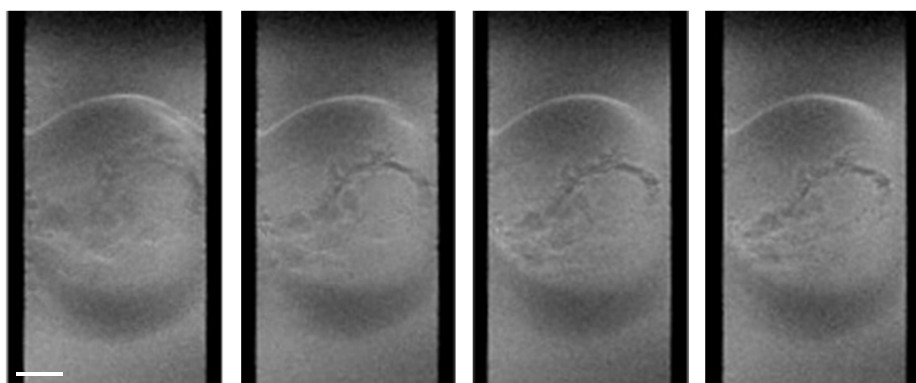

59  
60  
61  
62  
63  
64

**Figure S6. 2D MRI face-plane of *Shewanella* biofilm over time.** Sequential face-plane 2D MRI of the biofilm, from 12 to 16 days old. The surface coverage of the biofilm decreases slightly over time. The channel is 4 mm wide. The white bar near the bottom of the first frame represents 1 mm.

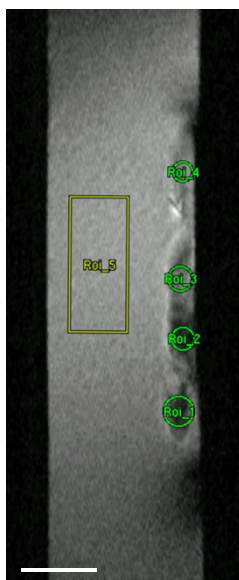

65

66

67

68

69

70

71

72

73

74

75

76

**Figure S7. *S. oneidensis* biofilm cluster locations chosen for  $D_e$  measurements.** Four clusters chosen to measure the average  $D_e$ , reported in Table 2. Roi\_1, Roi\_2, Roi\_3, and Roi\_4 correspond to Cluster 1, Cluster 2, Cluster 3, and Cluster 4, respectively. Roi\_5 highlights the approximate region used in both the *S. oneidensis* and *G. sulfurreducens* experiments to determine the  $D_{aq}$  value. The white bar near the bottom represents 1 mm.

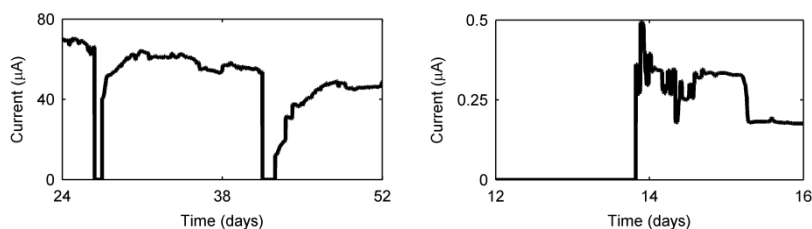

77

78

79

80

81

82

83

**Figure S8. Biofilm current production over time.** Left) *Geobacter sulfurreducens*; Right) *Shewanella oneidensis*. Current goes to zero during experiments when polarization is removed.

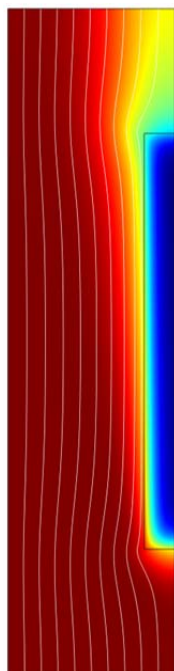

84  
85  
86  
87  
88  
89  
90  
91  
92  
93

**Figure S9. Two-dimensional model geometry.** Nine white streamlines show the path of the assumed laminar fluid flow of the growth medium, which enters the channel at the bottom and is pumped against gravity. The biofilm is represented by a rectangular slab. The black scale bar near the bottom right corresponds to 1 mm. An example heat map shows the local acetate concentration in both the bulk liquid and in the biofilm, ranging from 20 mM (dark red) to 0 mM (dark blue).

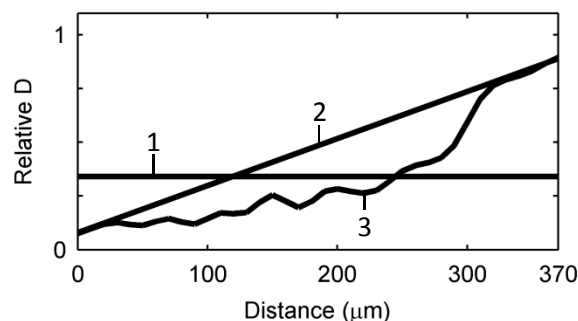

94  
95  
96  
97  
98  
99  
100  
101  
102

**Figure S10. Three different  $D_e$  assumptions for the model:** 1) a constant  $D_{rs}$  value, 2) a linearly decreasing  $D_{rs}$  profile, and 3) the true empirical profile. The constant  $D_{rs}$  chosen was identical to the average  $D_{rs}$  of the empirical data. Also, the minimum and maximum  $D_{rs}$  values in the linearly decreasing and empirical profiles were identical. The empirical data were taken from the measurements of the 52-day-old *G. sulfurreducens* biofilm shown in Figure 3.

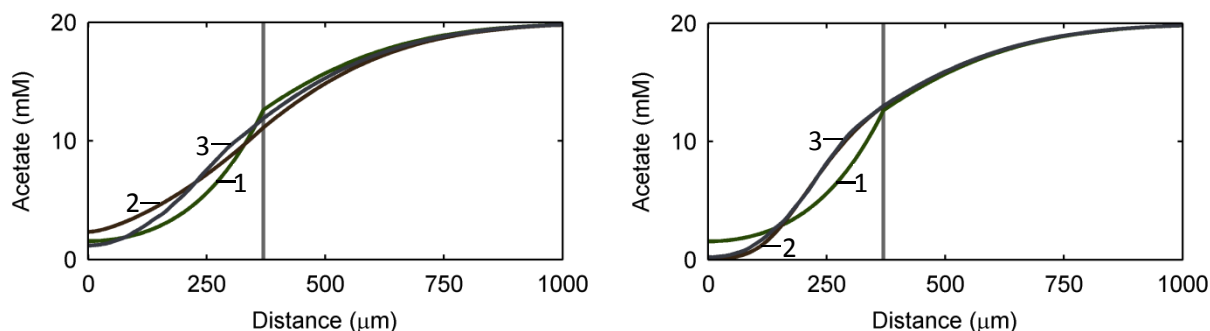

103  
104  
105  
106  
107  
108  
109  
110

**Figure S11. Simulated acetate concentration depth profiles.** Acetate concentration profiles calculated for 1) a constant  $D_{rs}$  value (green), 2) a linearly decreasing  $D_{rs}$  profile (brown), and 3) the true empirical profile (dark blue). Left) Profiles assuming constant biofilm density. Right) Profiles assuming a biofilm density that was related to the  $D_{rs}$  using Equation 2.

## Supplementary NMR Methods

### 2D Fourier transform MRI.

113 All 2D MRI data were collected using Bruker Paravision spin-echo method MSME. Face-plane  
114 (facing normal to the biofilm surface) 2DFT data employed field of view (FOV) dimensions of  
115 10.24 mm by 5.12 mm. One hundred twenty-eight repetitions were collected with an echo and  
116 repetition time ratio (TE/TR) of 10.85/1000 milliseconds and 128 phase-encoding steps, for a  
117 total acquisition time of 4.5 hours. A total of 256 complex points were sampled at a rate of 200  
118 Hz per pixel in the flow direction, with 128 phase-encoding steps in the lateral direction, for an  
119 in-plane resolution of 40  $\mu\text{m}$  by 40  $\mu\text{m}$ . The slice thickness was 3 mm. Normal-plane (facing  
120 parallel with the biofilm surface) 2DFT data employed field of view (FOV) dimensions of 10.24  
121 mm by 5.120 mm. A total of 256 complex points were sampled at a rate of 200 Hz per pixel in  
122 the flow direction, with 256 phase-encoding steps in the biofilm-normal direction, for an in-plane  
123 resolution of 40  $\mu\text{m}$  by 20  $\mu\text{m}$ . The slice thickness was 2 mm. All 2DFT scans employed  
124 Hermite 90-degree excitation pulses (10 kHz pulse bandwidth) and Hermite 180-degree radio  
125 frequency (RF) pulses (8 kHz RF pulse bandwidth).

126

### 127 *Diffusion-mapping 2D Fourier transform MRI.*

128 Diffusion mapping employed Paravision method DtiStandard with a repetition time of 500 ms,  
129 an echo time of 16.665 ms, a total of 32 averages, a pulse gradient width ( $\partial$ ) of 3 ms, a diffusion  
130 time interval ( $\Delta$ ) of 10 ms, and 256 phase-encoding steps. The imaging sequence was repeated  
131 with seven different  $b$ -factors [0-1200 s/mm<sup>2</sup> in 200-s/mm<sup>2</sup> increments (diffusion-sensitive  
132 direction aligned normal to the biofilm surface)] for a total measurement time of ~8 hr. The  $b$ -  
133 factor is dependent on the timing and amplitude of the gradient pulses and the gyromagnetic ratio  
134 of the nucleus of detection ( $H^1$ ). Renslow *et al.* (2010) describe in detail how the  $D_e$  maps and  
135 surface-averaged relative effective diffusion coefficient ( $D_{rs}$ ) profiles were generated<sup>55</sup>. Briefly,  
136 two-dimensional diffusion maps were generated by processing the individual images (Gaussian  
137 noise filtering followed by fast 2DFT processing and saving the magnitude of each pixel),  
138 and then performing a semilogarithmic analysis (via the Bloch-Torrey equation) of the  $b$ -  
139 factor-dependent intensity values of each image pixel above a preset noise threshold using  
140 a custom-written MATLAB script. The center voxels of the 2D  $D_e$  maps (corresponding to  
141 the central 2mm by 2mm portion of the biofilm) were averaged to yield a depth-dependent  
142  $D_{rs}$  profile with a resolution of 20  $\mu$ m. The central 2mm by 2mm voxel location and size  
143 were used to ensure that measurements were taken where the magnetic field had the  
144 highest homogeneity and to avoid magnetic susceptibility discontinuities.

145

146

### 147 **Supplementary Computational Modeling**

148 Comsol Multiphysics (version number 4.2.1.166, COMSOL Inc., Burlington, MA, USA), a finite  
149 element method simulation package, was used to build and test the model. An 8-core, 64-bit  
150 Microsoft Windows 7 computer with 16 GB of RAM was used to run the simulation.

151 The model geometry was constructed to represent the NMR microimaging biofilm  
152 reactor, but was restricted to the area around the biofilm and NMR measurement voxel. The  
153 height of the reactor was set at 2 mm, and the length was set to 20% of the actual length (8 mm),  
154 centered on the biofilm. Modeling only the middle 8 mm of the reactor produced an identical  
155 fluid flow profile and acetate concentration in the NMR measurement voxel while reducing  
156 computational time. The inlet boundary condition for fluid flow was defined by Equation S1 to  
157 ensure that the fluid flow profile was laminar and matched the profile produced when a full-  
158 length reactor was simulated. Laminar flow was assumed because of the low Reynolds number  
159 of 0.1 for a flow of 1 mL/hr<sup>55</sup>. The *G. sulfurreducens* biofilm was assumed to be a 370- $\mu$ m-thick  
160 rectangular slab positioned on the 5-mm electrode, utilizing a conductive electron transfer  
161 mechanism. Meshing of the two-dimensional domains (the NMR biofilm reactor and the biofilm)  
162 was performed using free triangular mesh elements, each with a maximum element size of  
163 20  $\mu$ m. Mesh elements along the center edge used to create depth profiles were constrained to a  
164 maximum element size of 1  $\mu$ m in order to generate smooth depth profile plots and to ensure a  
165 high element density where the profiles would be produced.

166 The modeling parameters were identical to those of the experimental setup after the *G.*  
167 *sulfurreducens* biofilm had reached 370  $\mu$ m thick, including fluid flow speed, inlet acetate  
168 concentration, and temperature. Acetate was fully oxidized in the biofilm assuming Nernst-  
169 Monod behavior, which is a specific case of multiplicative Monod behavior which accounts for  
170 the limitations of both the soluble electron donor (acetate) and the solid electron-accepting  
171 electrode<sup>1</sup>. The Nernst-Monod substrate utilization equation is given by:

172

$$q = q_{max} \left( \frac{S}{S + K_s} \right) \left( \frac{1}{1 + e^{\left( \frac{-F}{RT} (E - E_{K_A}) \right)}} \right)$$

173

174

**Equation S1**

175

176 where  $q$  is the acetate substrate utilization rate (mmol/g·s),  $q_{max}$  is the maximum acetate substrate  
177 utilization rate (mmol/g·s),  $S$  is the concentration of acetate (mM),  $K_s$  is the half-saturation  
178 coefficient (mM),  $F$  is Faraday's constant (s·A/mol),  $R$  is the universal gas constant  
179 (J/K·mol),  $T$  is the temperature (K),  $E$  is the electrode polarization potential (V), and  $E_{K_A}$  is  
180 the half-maximum rate potential (V). However, for our case we ensured that the Nernst  
181 term (Equation S2) was  $\sim 1$  by assuming a sufficiently positive electrode polarization  
182 potential:

183

$$\frac{1}{1 + e^{\left( \frac{-F}{RT} (E - E_{K_A}) \right)}} \cong 1$$

184

**Equation S2**

185

186 This was done to match our experimental conditions and to ensure that the  $D_{rs}$  assumptions were  
187 the only cause for solution differences. The empirical  $D_{rs}$  profile in the biofilm was approximated  
188 by interpolating the data using piecewise cubic interpolation. Biofilm density was either assumed  
189 to be constant or was related to the  $D_{rs}$  using Equation 2. Acetate diffused following Fick's law  
190 and was consumed within the biofilm according to the Nernst-Monod substrate utilization  
191 equation. A steady-state mass balance for acetate is given by:

192

$$\frac{\partial S}{\partial t} = \nabla \cdot (D_{rs} \nabla S) - Xq = 0$$

193

**Equation S3**

194

195 Flux at the top of the biofilm, a parameter used to highlight the effects of different  $D_{rs}$   
196 assumptions, was determined by averaging the flux of a 2 mm × 2 mm square surface located at  
197 the top 1 μm of the biofilm and concentric with the electrode. This region corresponded with the  
198 actual NMR measurement voxel used to generate the 2D  $D_{rs}$  maps. The total current produced by  
199 the biofilm was determined by integrating acetate flux over the projected volume of the biofilm  
200 to determine the total flux of acetate consumed by the biofilm and the electron equivalents  
201 generated.

202

203

## 204 **Supplementary Discussion**

### 205 *Effect of temperature on $D_{aq}$*

206 The  $D_{aq}$  in the *G. sulfurreducens* biofilm experiments was  $2.82 \cdot 10^{-9} \text{ m}^2/\text{s}$  ( $\sigma: 0.10 \cdot 10^{-9} \text{ m}^2/\text{s}$ ).  
207 This is slightly higher than the typical value for water at 30 °C [e.g., 5% higher than values  
208 reported by Beuling *et al.* (1998) and 17% higher than values reported by Renslow *et al.* (2010)];  
209 however, diffusion coefficient values are known to be highly dependent on temperature<sup>2-4</sup>.



210 Temperatures as high as 30.6 °C were recorded for the N<sub>2</sub> purge gas out of the bottom of the  
211 NMR probe, so it is likely that the NMR biofilm reactor experienced temperatures that were  
212 slightly higher than this because of the proximity of the reactor to the gas stream inlet.  
213 Interpolating from diffusion coefficient values given by Beuling *et al.* (1998), the reactor  
214 temperature should be around 31.7 °C to have a diffusion coefficient value of  $2.82 \cdot 10^{-9}$  m<sup>2</sup>/s.  
215 Furthermore, differences in growth medium composition can affect the D<sub>aq</sub> of water. The D<sub>aq</sub> in  
216 the *S. oneidensis* biofilm experiments was  $2.49 \cdot 10^{-9}$  m<sup>2</sup>/s ( $\sigma$ :  $0.06 \cdot 10^{-9}$  m<sup>2</sup>/s). Similar to the *G.*  
217 *sulfurreducens* experiment, this value is slightly higher than expected for water at 25 °C (8%  
218 higher than values reported by Beuling *et al.* (1998))<sup>2</sup>. Interpolating from values given by  
219 Beuling *et al.* (1998), the NMR biofilm reactor temperature may have been as high as 27.5 °C to  
220 measure a D<sub>aq</sub> of  $2.49 \cdot 10^{-9}$  m<sup>2</sup>/s. Other possible causes of the elevated D<sub>aq</sub> are the presence of  
221 background magnetic gradients in the NMR and less than ideal diffusion gradient pulses. The D<sub>e</sub>  
222 results in the manuscript are reported as relative values so that the data are widely applicable for  
223 a wide range of temperatures used in EAB mathematical models and the exact cause for the  
224 slight elevation is not a concern.

225

226

### Supplementary Works Cited

227

228 1. A. K. Marcus, C. I. Torres and B. E. Rittmann, *Biotechnol. Bioeng.*, 2007, **98**, 1171-1182.

229

230 2. E. E. Beuling, D. van Dusschoten, P. Lens, J. C. van den Heuvel, H. Van As and S. P. P.  
231 Ottengraf, *Biotechnol. Bioeng.*, 1998, **60**, 283-291.

232

233 3. R. S. Renslow, P. D. Majors, J. S. McLean, J. K. Fredrickson, B. Ahmed and H. Beyenal,  
234 *Biotechnol. Bioeng.*, 2010, **106**, 928-937.

235

236 4. J. Simpson and H. Carr, *Physical Review*, 1958, **111**, 1201.

237

238
